# Supplementary material
Source: Research Square preprint supplement (doi:10.21203/rs.3.rs-9044137/v1)
Supplement: Supplementary file 1 [file aab1b3eafb5a56c70c946d5c.docx]

**Table_1** Immunofluorescence analysis using an anti–collagen IV antibody (a marker of bone regeneration) confirmed palatal regeneration, in agreement with histological findings. Molecular analysis revealed a significant upregulation of the osteoblast-related gene **SPARC** in regenerated tissue (RIG) compared with control tissue (CTR), supporting its role in osteoblast differentiation.
